# Supplementary material
Source: Springer Nature journal article supplement (https://www.springermedizin.de/resource/supplementary/13012_2013_678_MOESM3_ESM.pdf/9630466)
Supplement: MOESM3 [file 9630466]

| Question list                                   | End statement                                                                                                                 | Strongly Agree | Agree | Neither agree nor disagree | Disagree | Strongly disagree |
|-------------------------------------------------|-------------------------------------------------------------------------------------------------------------------------------|----------------|-------|----------------------------|----------|-------------------|
| I am confident that I can...                    | "...ensure that patients are not sent for an X-ray unless it is impossible to obtain aspirate or the pH reading is above 5.5" | 1              | 2     | 3                          | 4        | 5                 |
| I know why it is important to...                |                                                                                                                               | 1              | 2     | 3                          | 4        | 5                 |
| I have the necessary skills to...               |                                                                                                                               | 1              | 2     | 3                          | 4        | 5                 |
| It is an integral part of my duty of care to... |                                                                                                                               | 1              | 2     | 3                          | 4        | 5                 |
